# Supplementary material
Source: PubMed Central journal article supplement (PMC8175071)
Supplement: NIHMS1633873-supplement-1.pdf [file NIHMS1633873-supplement-1.pdf]

Supplemental Table 1. Metabolic and Hormonal Characteristics by Age in Pre-Menopausal Women with NAFLD (n=207)

| Characteristic                                    | First Age Quartile (n=52) | Second Age Quartile (n=52) | Third Age Quartile (n=52) | Fourth Age Quartile (n=51) | p value |
|---------------------------------------------------|---------------------------|----------------------------|---------------------------|----------------------------|---------|
| Age, median years (IQR)                           | 25 (22-27)                | 33 (31-34)                 | 39 (37-40)                | 47 (44-50)                 | <0.001  |
| Body mass index, median kg/cm <sup>2</sup> (IQR)  | 34.9 (30.8-39.5)          | 36.6 (30.4-39.0)           | 37.2 (32.4-44.0)          | 36.4 (32.7-40.5)           | 0.273   |
| Waist circumference, median cm (IQR)              | 113 (95-121)              | 110 (97-117)               | 113 (100-124)             | 109 (100-117)              | 0.289   |
| Abdominal adiposity (waist > 88cm), n (%)         | 48 (92.3)                 | 46 (88.5)                  | 50 (96.2)                 | 48 (94.1)                  | 0.480   |
| Hypertension, n (%)                               | 7 (13.5)                  | 15 (28.9)                  | 18 (34.6)                 | 25 (49.0)                  | 0.001   |
| HDL, median mg/dL (IQR)                           | 41 (35-52)                | 43 (34-49)                 | 42 (36-48)                | 44 (36-53)                 | 0.668   |
| LDL, median mg/dL (IQR)                           | 107 (91-131)              | 110 (90-130)               | 120 (97-140)              | 125 (96-152)               | 0.065   |
| Triglycerides, median mg/dL (IQR)                 | 151 (112-197)             | 144 (118-200)              | 148 (121-185)             | 133 (110-199)              | 0.861   |
| Dyslipidemia                                      | 50 (96.2)                 | 51 (98.1)                  | 50 (96.2)                 | 47 (92.2)                  | 0.513   |
| Type 2 diabetes, n (%)                            | 15 (28.9)                 | 14 (26.9)                  | 21 (40.4)                 | 17 (33.3)                  | 0.467   |
| HOMA-IR, median mg/dL (IQR)                       | 5.1 (2.5-10.2)            | 5.0 (3.1-8.6)              | 4.5 (3.2-9.2)             | 3.8 (2.4-6.1)              | 0.295   |
| Polycystic ovary syndrome, n (%)                  | 11 (21.2)                 | 17 (32.7)                  | 11 (21.2)                 | 4 (7.8)                    | 0.022   |
| Total testosterone, median pg/mL (IQR)            | 239 (141-363)             | 223 (126-314)              | 212 (120-280)             | 170 (100-270)              | 0.054   |
| Free testosterone (Free T), median pg/mL (IQR)    | 3.5 (1.9-5.2)             | 2.7 (1.2-5.6)              | 2.9 (1.7-4.8)             | 2.4 (1.6-3.9)              | 0.197   |
| Sex hormone binding globulin, median nmol/L (IQR) | 35.1 (22.9-95.5)          | 37.6 (24.6-63.4)           | 36.9 (29.4-55.4)          | 41.2 (27.1-61.0)           | 0.981   |
| NASH (borderline or definite), n (%)              | 34 (65.4)                 | 37 (71.2)                  | 39 (75.0)                 | 34 (66.7)                  | 0.701   |
| NAFLD Activity Score, median (IQR)                | 4 (3-5)                   | 5 (3-6)                    | 4 (3-6)                   | 5 (3-6)                    | 0.332   |
| Any fibrosis, n (%)                               | 32 (61.5)                 | 34 (65.4)                  | 37 (71.2)                 | 37 (72.6)                  | 0.602   |
| Advanced fibrosis, n (%)                          | 4 (7.7)                   | 7 (13.5)                   | 9 (17.3)                  | 11 (21.6)                  | 0.238   |

Characteristics compared by chi-square and Kruskal-Wallis tests, as appropriate

Supplemental Table 2. Association of Free Testosterone with NASH and NASH Fibrosis Adjusted for HOMA-IR, Waist circumference, and Dyslipidemia in Youngest Age Quartile (n=52)

| NAFLD Comparisons     | Adjusted OR<br>(95% CI), p value |
|-----------------------|----------------------------------|
| NASH (vs NAFL)        | 2.09 (1.04-4.21),<br>p=0.038     |
| Any fibrosis          | 2.01 (0.95-4.27),<br>p=0.069     |
| Higher fibrosis stage | 2.15 (1.19-3.88),<br>p=0.011     |
